# Supplementary material for: High-cell-voltage supercapacitor of carbon nanotube/carbon cloth operating in neutral aqueous solution
Source: Royal Society of Chemistry journal article supplement (doi:10.1039/c1jm14716a), 2012-01-01
Supplement: c1jm14716a.pdf [file c1jm14716a.pdf]

## Electronic Supplementary Information

High-cell-voltage Supercapacitor of Carbon Nanotube/Carbon Cloth Operating in  
Neutral Aqueous Solution

Yu-Kuei Hsu,<sup>\*a</sup> Ying-Chu Chen,<sup>b</sup> Yan-Gu Lin,<sup>c</sup> Li-Chyong Chen,<sup>\*b,d</sup> and Kuei-Hsien  
Chen<sup>b,c</sup>

a Department of Opto-Electronic Engineering, National Dong Hwa University,  
Hualien, Taiwan. Fax: 886-3-8634180; Tel: 886-3-8634196;  
E-mail: [ykhsu@mail.ndhu.edu.tw](mailto:ykhsu@mail.ndhu.edu.tw)

b Center for Condensed Matter Sciences, National Taiwan University, Taipei, Taiwan.  
Fax: 886-2-2365-5404; Tel: 886-2-33665249; E-mail: [chenlc@ntu.edu.tw](mailto:chenlc@ntu.edu.tw)

c Institute of Atomic and Molecular Science, Academia Sinica, Taipei, Taiwan.

d Center for Emerging Materials and Advanced Devices, National Taiwan University,  
Taipei, Taiwan.

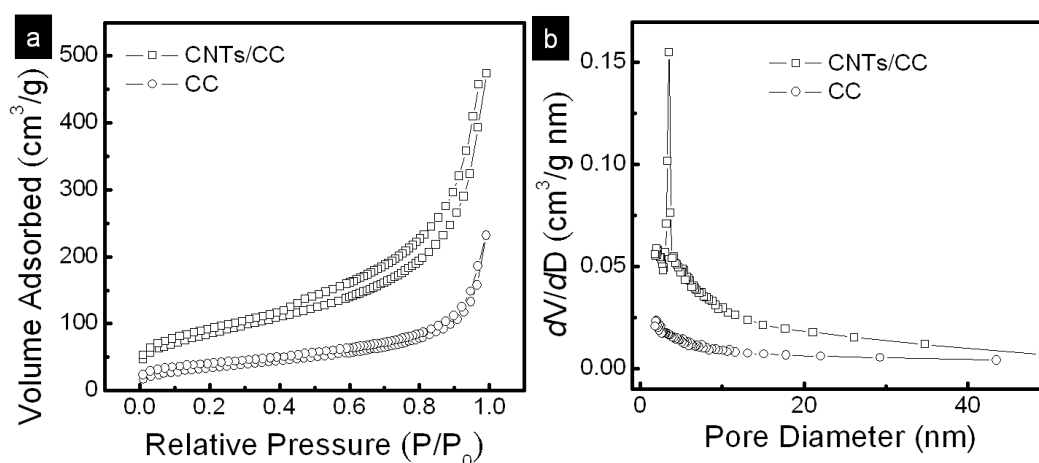

Figure S1 (a) Nitrogen adsorption/desorption isotherms of sample. (b) The pore size distribution plots that were calculated by the BJH formula in the adsorption branch isotherm.
